# Supplementary material for: Controlled synthesis of V2O5/MWCNT core/shell hybrid aerogels through a mixed growth and self-assembly methodology for supercapacitors with high capacitance and ultralong cycle life
Source: Royal Society of Chemistry journal article supplement (doi:10.1039/c5ta02708j), 2015-01-01
Supplement: c5ta02708j1.pdf [file c5ta02708j1.pdf]

**Electronic Supplementary Information (ESI)**

**Controlled synthesis of V<sub>2</sub>O<sub>5</sub>/MWCNTs core/shell hybrid aerogels through a mixed growth and self-assembly methodology for supercapacitors with high capacitance and ultralong cycle life**

Yingjie Wu, Guohua Gao,\* Huiyu Yang, Wenchao Bi, Xin Liang, Yuerou Zhang, Guyu Zhang, and  
Guangming Wu\*

Shanghai Key Laboratory of Special Artificial Microstructure, School of Physics Science and Engineering, Tongji University, Shanghai, 200092, China

E-mail: gao@tongji.edu.cn; wugm@tongji.edu.cn

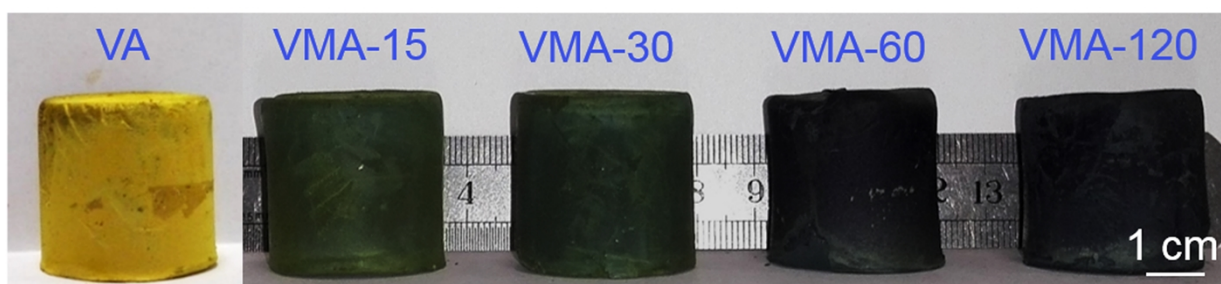

Fig. S1 Digital photographs of as-prepared aerogels.

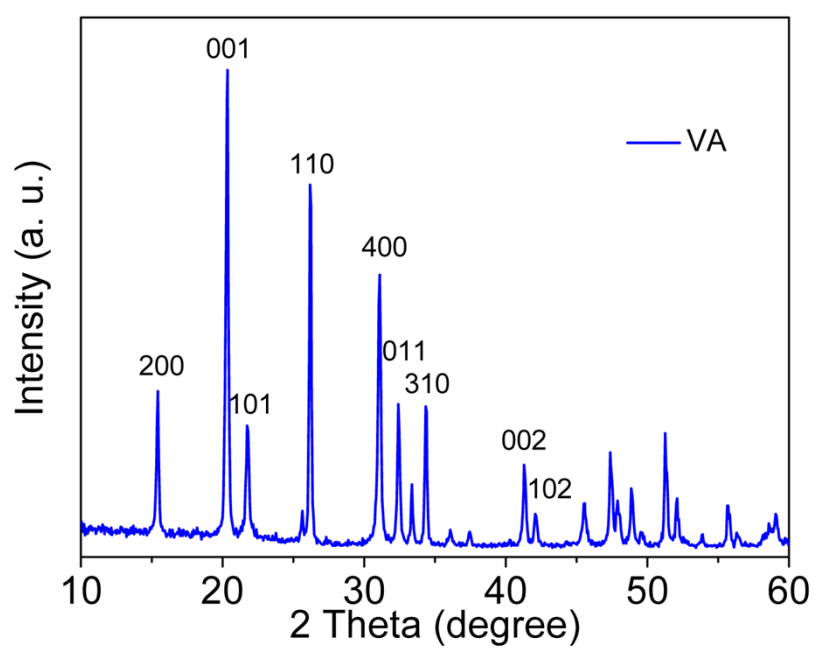

Fig. S2 XRD patterns of crystallized  $V_2O_5$  aerogel after thermal treatment at 300 °C for 3h.

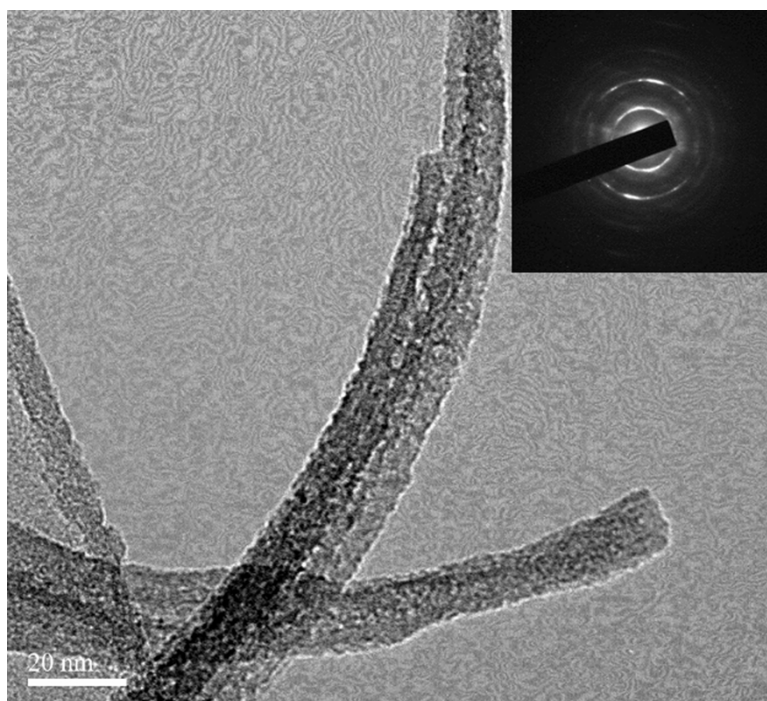

Fig. S3 HRTEM image and SAED patterns (inset) of VO<sub>x</sub> nanofibers before thermal treatment.

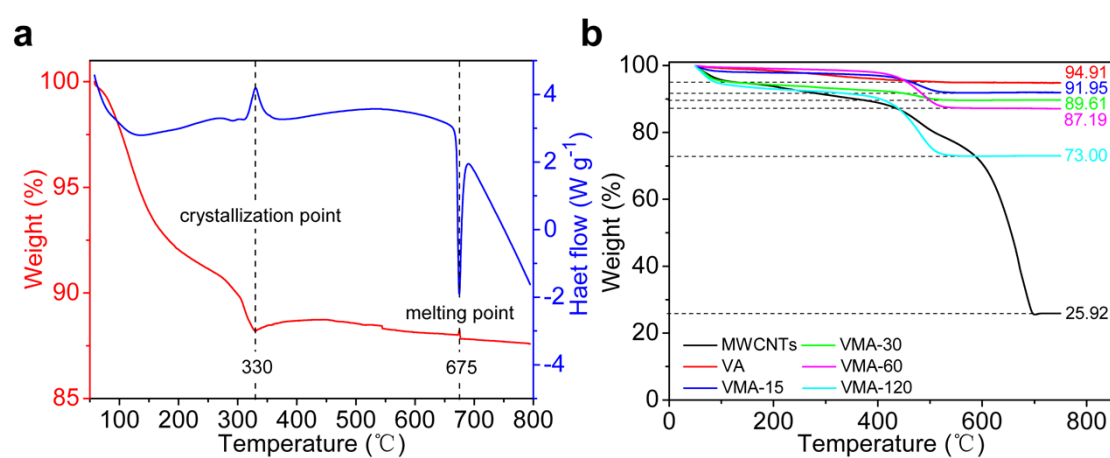

Fig. S4 (a) TG and DSC curves of  $\text{VO}_x$  aerogel before thermal treatment in air atmosphere, indicating a crystallization point of 330 °C; (b) TG curves of MWCNTs,  $\text{V}_2\text{O}_5$  aerogel, VMA-15, VMA-30, VMA-60 and VMA-120 hybrid aerogels in air.

The content of MWCNTs ( $C_M$ ) in hybrid aerogels is calculated according to their TG curves by using the formula  $W = 0.9491(1 - C_M) + 0.2592C_M$ , where  $W$  stands for the final weight of hybrid aerogels in TG curves, 0.9491 and 0.2592 is the final weight of pure  $\text{V}_2\text{O}_5$  aerogel and pure MWCNTs, respectively.

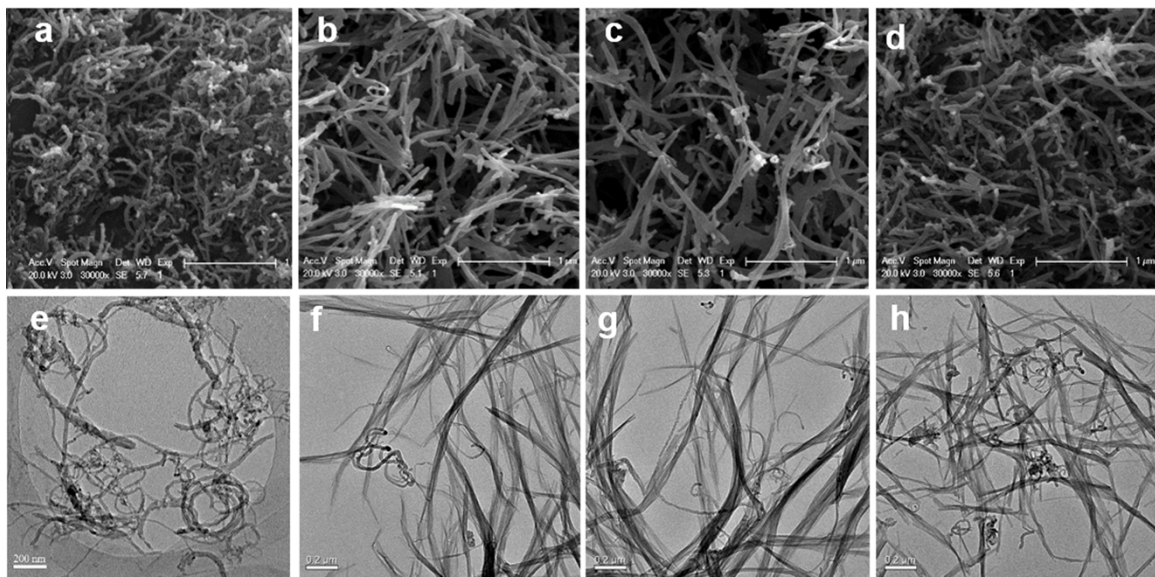

Fig. S5 SEM and TEM images of (a, e) MWCNTs, (b, f) VMA-15, (c, g) VMA-30 and (d, h) VMA-60, respectively.

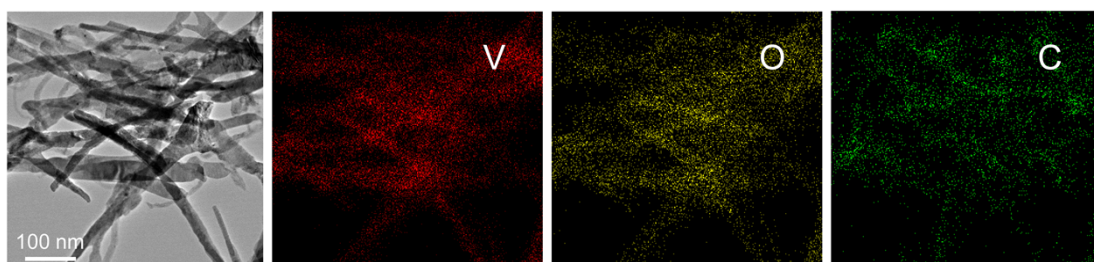

Fig. S6 STEM images and corresponding elemental mapping of  $V_2O_5$ /MWCNTs core/shell hybrid aerogels.

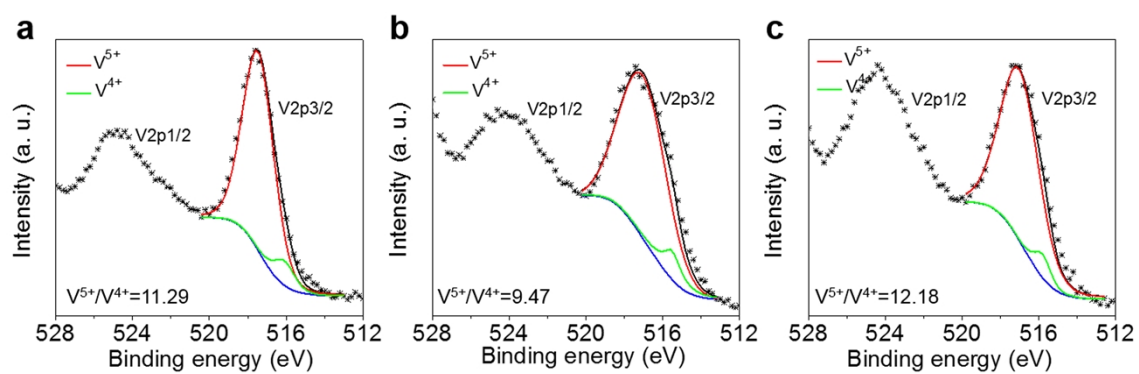

Fig. S7 XPS spectra of V<sub>2p3/2</sub> in (a) VMA-15, (b) VMA-30 and (c) VMA-60.



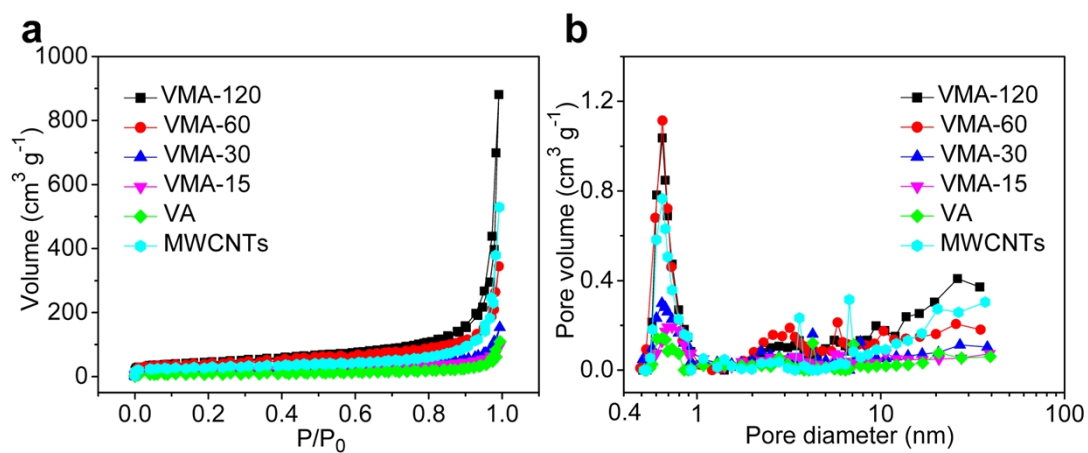

Fig. S8 Nitrogen adsorption–desorption isotherms (a) and Barrett–Joyner–Halenda (BJH) pore–size distribution (b) of acid–treated MWCNTs, prepared  $\text{V}_2\text{O}_5$  aerogel and  $\text{V}_2\text{O}_5/\text{MWCNTs}$  core/shell hybrid aerogels.

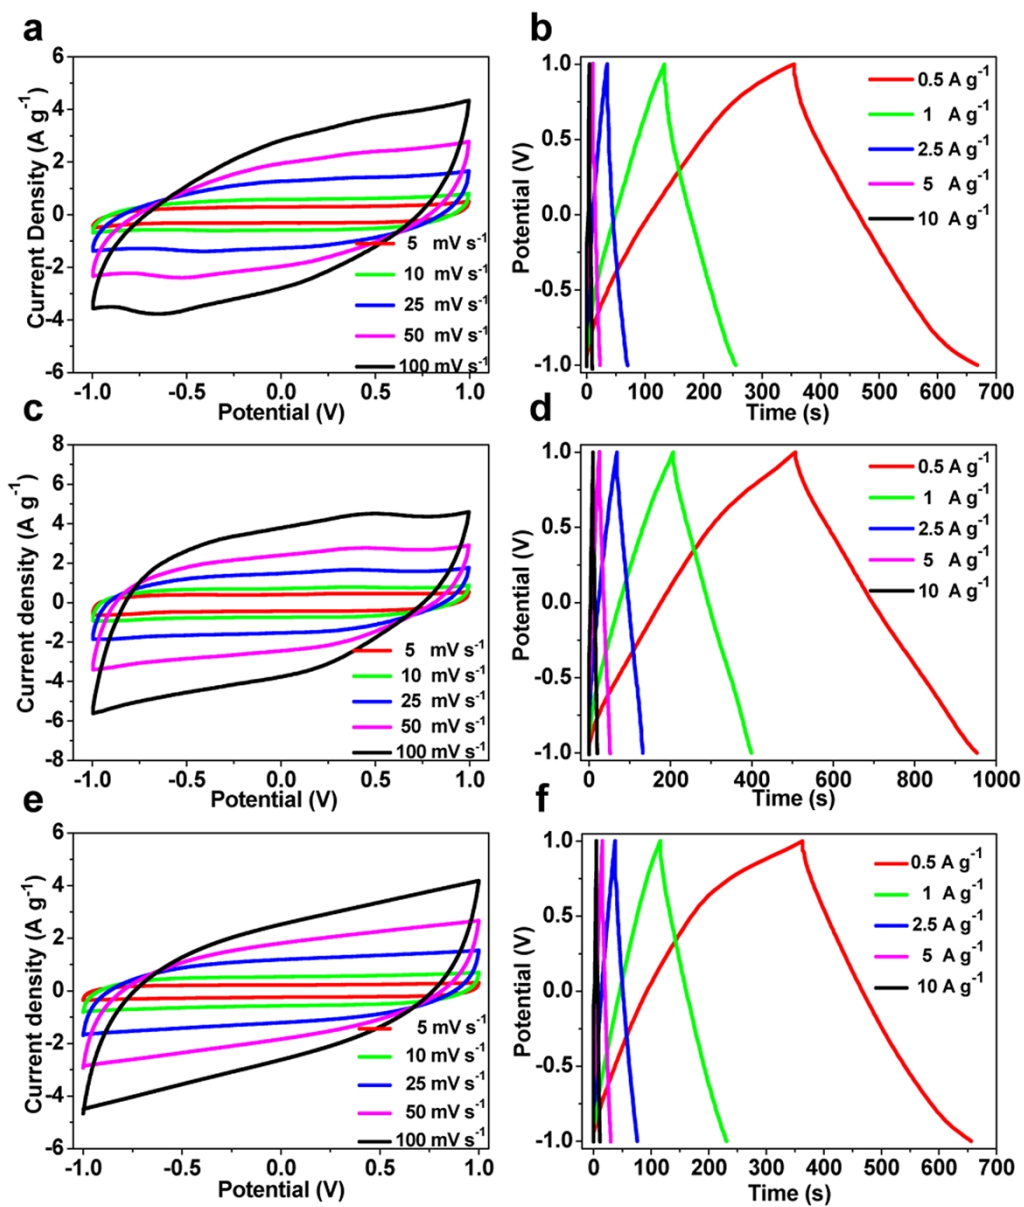

Fig. S9 CV and galvanostatic charge/discharge curves of (a, b) raw  $\text{V}_2\text{O}_5$  powder, (c, d) original  $\text{V}_2\text{O}_5$  aerogel and (e, f) MWCNTs, respectively.

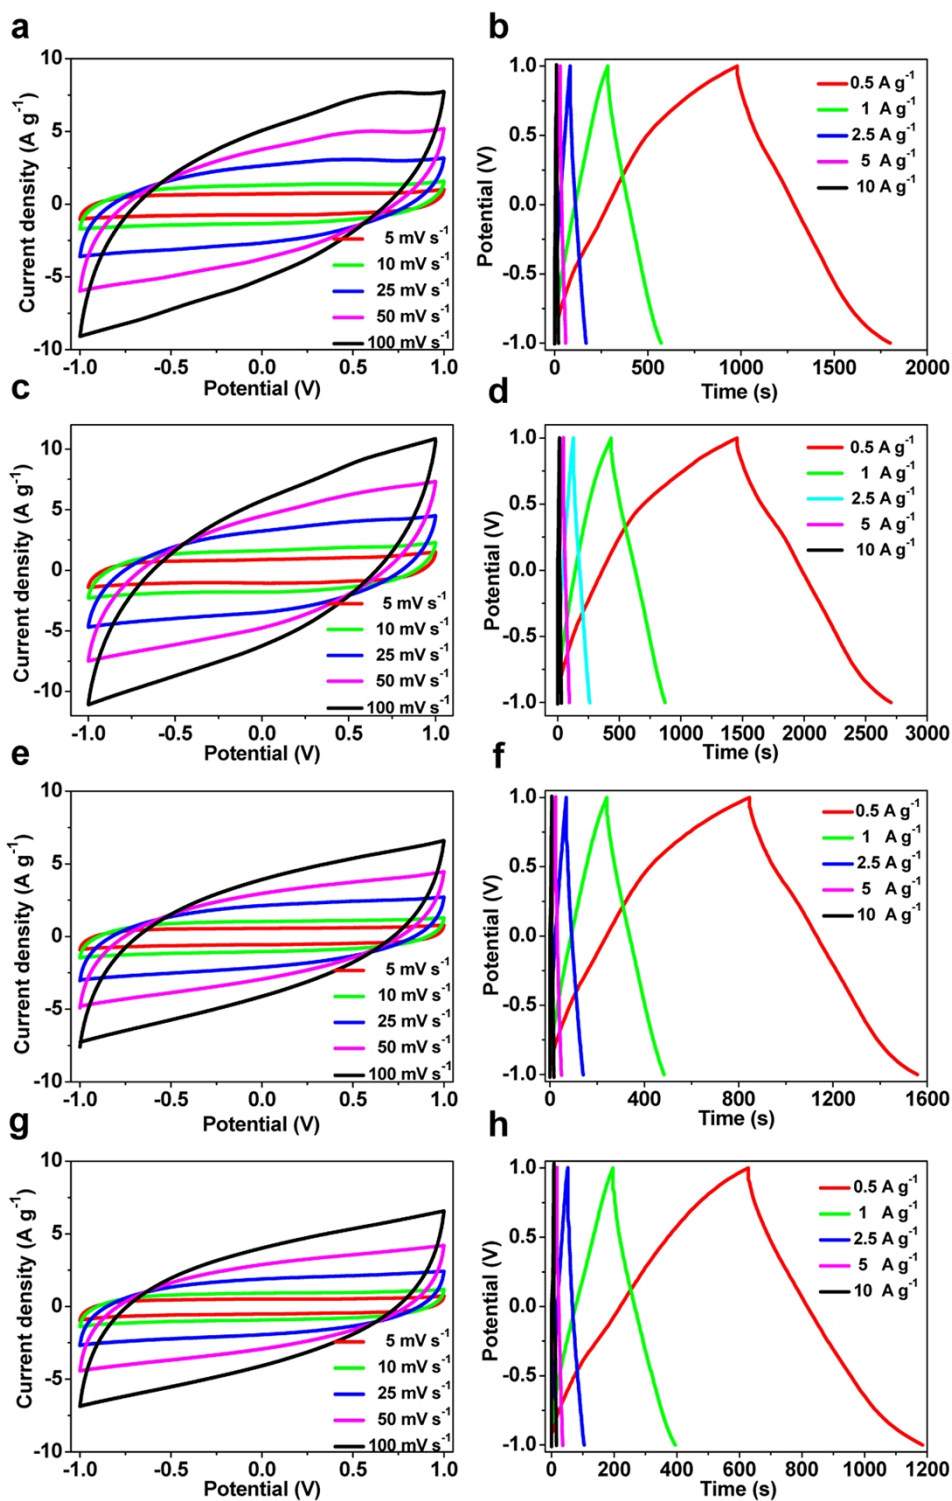

Fig. S10 CV and galvanostatic charge/discharge curves of (a, b) VMA-15, (c, d) VMA-30, (e, f) VMA-60 and (g, h) VMA-120, respectively.

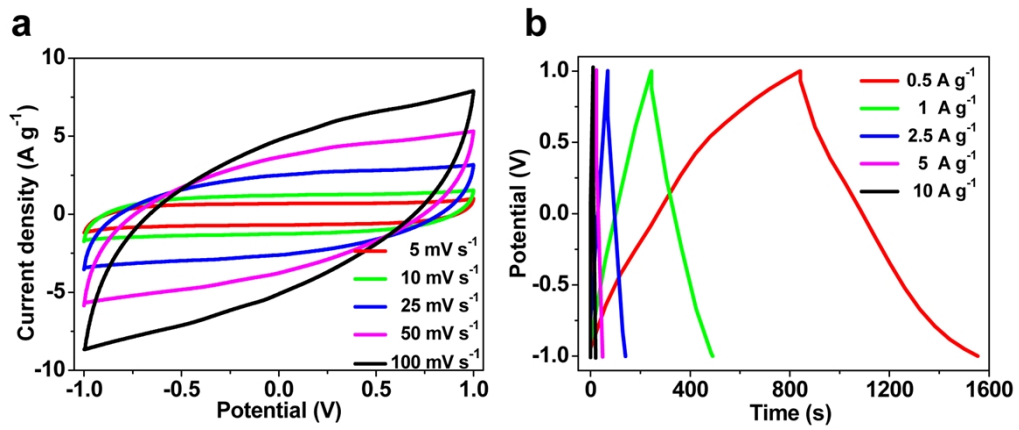

Fig. S11 CV (a) and galvanostatic charge/discharge curves (b) of  $V_2O_5$  aerogel/MWCNTs composite (VMC-30).

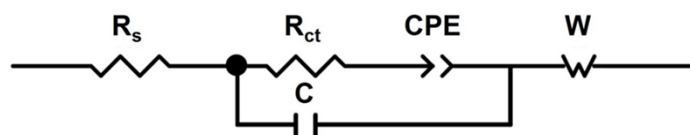

Fig. S12 Electron equivalent circuit to analyze the EIS profiles of raw  $V_2O_5$  powder, synthesized aerogels,  $V_2O_5$  aerogel/MWCNTs composite (VMC-30) and MWCNTs electrodes.

Table S1 The electrolyte resistance ( $R_e$ ) and charge transfer resistance ( $R_{ct}$ ) calculated from the EIS profiles of raw  $V_2O_5$  powder, synthesized aerogels,  $V_2O_5$  aerogel/MWCNTs composite (VMC-30) and MWCNTs electrodes.

|                       | $V_2O_5$ | VA   | VMA-15 | VMA-30 | VMA-60 | VMA-120 | MWCNTs | VMC-30 |
|-----------------------|----------|------|--------|--------|--------|---------|--------|--------|
| $R_e$ ( $\Omega$ )    | 0.52     | 0.54 | 0.52   | 0.52   | 0.48   | 0.49    | 0.48   | 0.47   |
| $R_{ct}$ ( $\Omega$ ) | 49.33    | 5.87 | 3.22   | 2.28   | 2.27   | 1.99    | 1.80   | 4.82   |
